# Supplementary material
Source: PubMed Central journal article supplement (PMC3386077)
Supplement: 1202786109_pnas.201202786SI.pdf [file 1202786109_pnas.201202786SI.pdf]

# Supporting Information

Képiró et al. 10.1073/pnas.1202786109

## SI Text

The analytical data is as follows: (-)-para-azido-blebbistatin:  $^1\text{H}$  chemical shifts, ppm: 2.26 (2, 2H, multiplet), 2.30 (11, 3H, singlet), 3.95 (3A, 1H, multiplet), 4.05 (3B, 1H, multiplet), 6.84 (12, 1H, singlet), 7.12 (8, 1H, doublet,  $^3J_{\text{HH}} = 8.1$  Hz), 7.19 (3', 2H, doublet,  $^3J_{\text{HH}} = 8.9$  Hz), 7.40 (7, 1H, dd,  $^3J_{\text{HH}} = 8.1$  Hz,  $^4J_{\text{HH}} = 1.8$  Hz), 7.54 (5, 1H, doublet,  $^4J_{\text{HH}} = 1.8$  Hz), 8.15 (2', 2H,

doublet,  $^3J_{\text{HH}} = 8.9$  Hz).  $^{13}\text{C}$  chemical shifts, ppm: 20.0 (11), 28.0 (2), 47.2 (3), 73 (3A), 119.1 (3'), 120.8 (2'), 121.1 (10), 125.5 (8), 126.0 (5), 132.4 (6), 134.4 (1'), 136.0 (7), 138.1 (4'), 148.9 (9), 165.4 (2x), 194.7 (4). ES-MS (Q-TOF Premier mass spectrometer; Waters): (M+1) 334.1306. Calculated for  $\text{C}_{18}\text{H}_{16}\text{N}_5\text{O}_2$ , 334.1304. Brownish yellow powder. Storage:  $-20^\circ\text{C}$ . Protect from light. No degradation in 1 y.

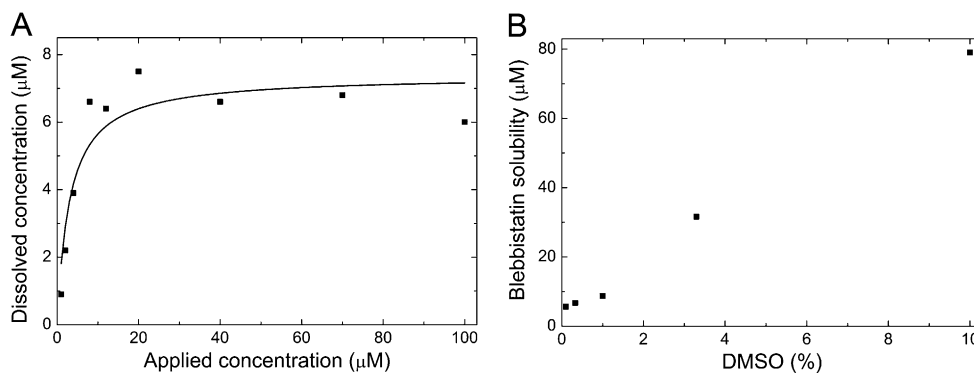

**Fig. S1.** Solubility of blebbistatin in assay buffer and its dependence on DMSO concentration. (A) 1, 2, 4, 8, 12, 20, 40, 70, and 100  $\mu\text{M}$  blebbistatin solutions in assay buffer were prepared, vortexed thoroughly, and centrifuged at  $12,100 \times g$  for 5 min. Absorption spectra of the supernatants were recorded and the concentrations of the dissolved blebbistatin were determined ( $\epsilon_{427}^{\circ} = 6,100 \text{ M}^{-1}\text{cm}^{-1}$ ). Based on the fitted hyperbola, the solubility of blebbistatin in assay buffer (see *Materials and Methods*) containing 0.1% DMSO was  $7.4 \pm 0.6 \mu\text{M}$ . (B) Next, 100  $\mu\text{M}$  blebbistatin solutions were prepared in assay buffer containing 0.1%, 0.3%, 1%, 3.3%, and 10% DMSO. After vortexing, the solutions were centrifuged at  $12,100 \times g$  for 5 min. Absorption spectra of the supernatants were recorded and the concentrations of dissolved blebbistatin were determined. The solubility of blebbistatin increased quasi-linearly with DMSO concentration to 80  $\mu\text{M}$  at 10% DMSO.

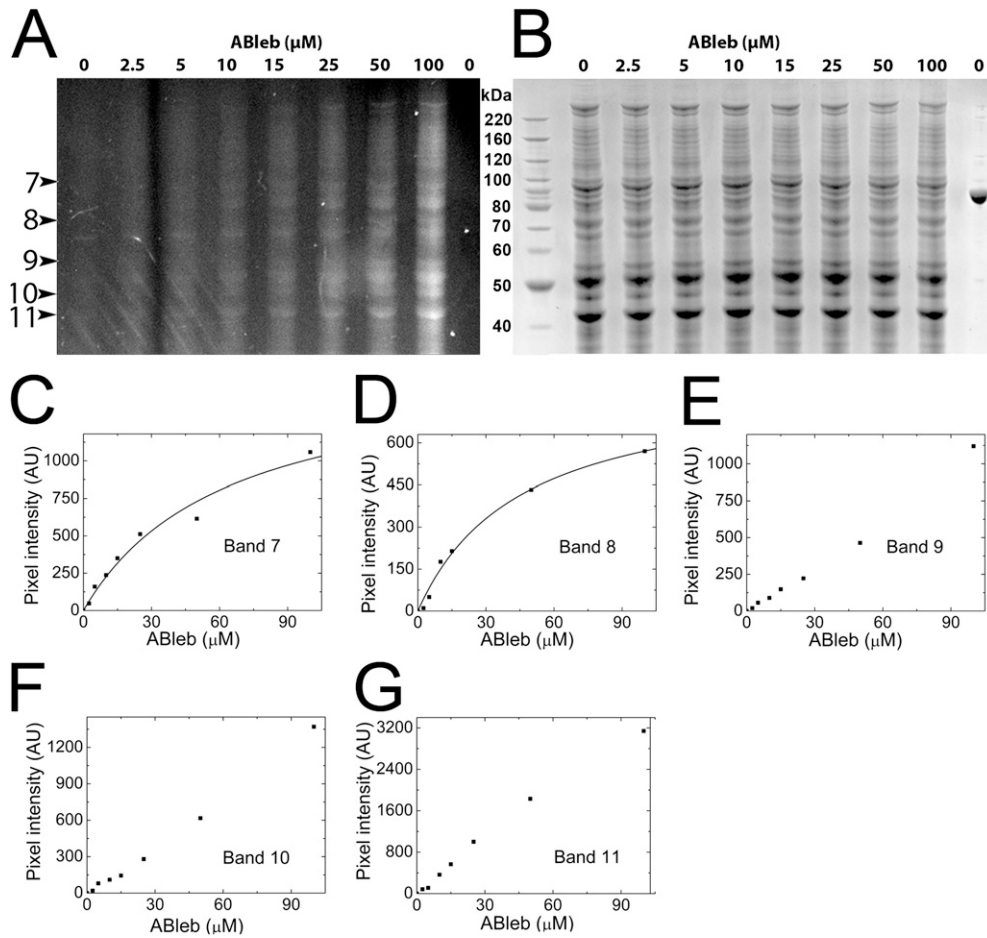

**Fig. S2.** SDS/PAGE analysis of azidoblebbistatin crosslinking of proteins in *Dictyostelium discoideum* (*Dd*) whole-cell lysates. Azidoblebbistatin-attached proteins in *Dd* myosin II motor domain (*DdMd*)-expressing *Dd* whole-cell lysates were detected by fluorescence of the covalently bound inhibitor (A) and, on the same gel, the protein contents were analyzed by subsequent Coomassie staining (B). Purified *DdMd* was loaded in the right-most lane of the gel as a control. Fluorescent bands are indicated at the left side of panel A in the order of increasing mobility. (C–G) The azidoblebbistatin concentration dependence of the fluorescence intensity of azidoblebbistatin-crosslinked protein bands. Determined  $EC_{50}$  values were  $63 \mu\text{M}$  and  $45 \mu\text{M}$  for bands 7 and 8, respectively. In the case of bands 9–11, the  $EC_{50}$  values were higher than  $100 \mu\text{M}$ .
